# Supplementary material for: Determinants of epidemic size and the impacts of lulls in seasonal influenza virus circulation
Source: PubMed Central journal article supplement (PMC10796432; doi:10.1038/s41467-023-44668-z), 2024-01-18
Supplement: 41467_2023_44668_MOESM3_ESM.pdf [file 41467_2023_44668_MOESM3_ESM.pdf]

## **Description of Additional Supplementary Files**

File Name: Supplementary Data 1

Description: GISAID Acknowledgement Table
